# Supplementary material
Source: PubMed Central journal article supplement (PMC4759799)
Supplement: rsif20150938supp1.pdf [file rsif20150938supp1.pdf]

## **Supplementary Material**

### **Type III secretion filaments as scaffolds for inorganic nanostructures**

*Anum Azam and Danielle Tullman-Ercek*

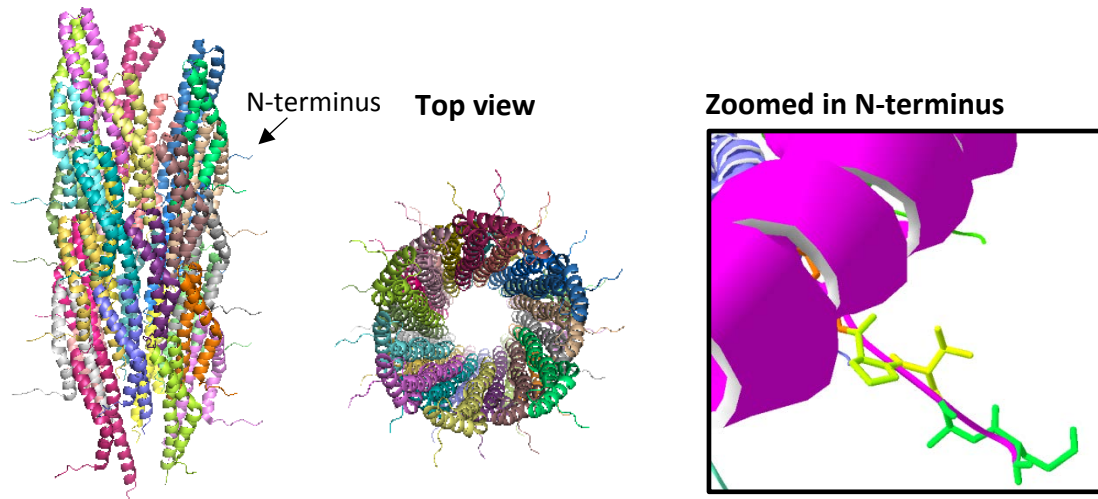

**Figure S1.** Atomic model of oligomerized PrgI needle from Loquet *et al.* (PDB code 2LPZ) [1]

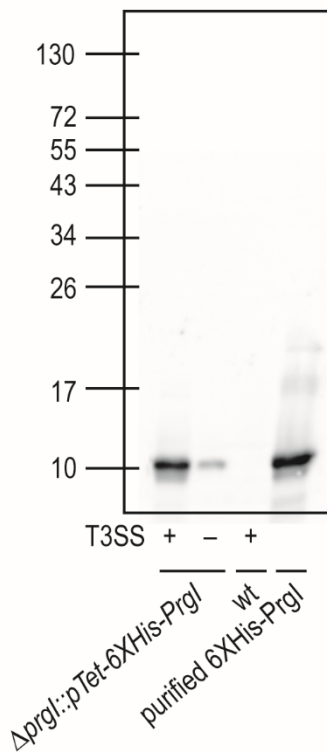

**Figure S2.** Anti-polyhistidine western blot showing presence of 6XHis-PrgI in samples containing needles sheared from the  $\Delta prgI$  strain with plasmid-borne 6XHis-PrgI, grown with and without T3SS-inducing conditions. These are compared with non-modified needles sheared from wild type cells and recombinant, purified 6XH-PrgI. Cells expressing 6XH-PrgI from the *pTet* promoter were induced with 42 ng/ml aTc.

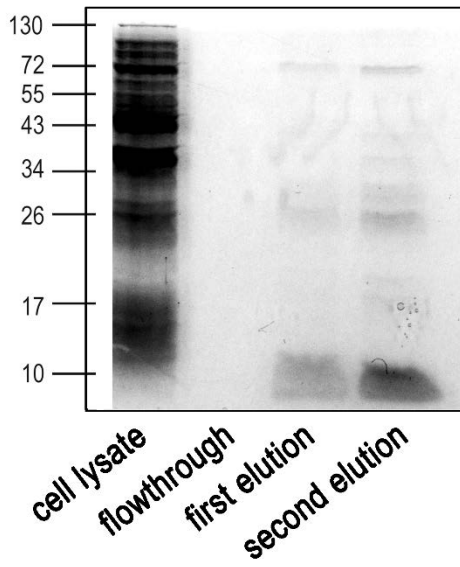

**Figure S3.** SDS-PAGE showing stages in 6XHis-PrgI purification from soluble BL21 cell lysate using  $\text{Ni}^{2+}$  affinity column chromatography.

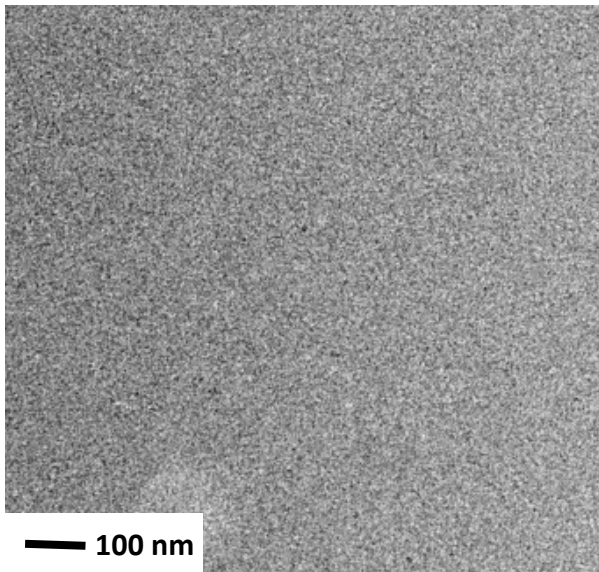

**Figure S4.** Recombinant 6XHis-PrgI<sup>Q26A/K50A</sup>, when expressed and purified, does not assemble into filaments. Image from 17 days after purification.

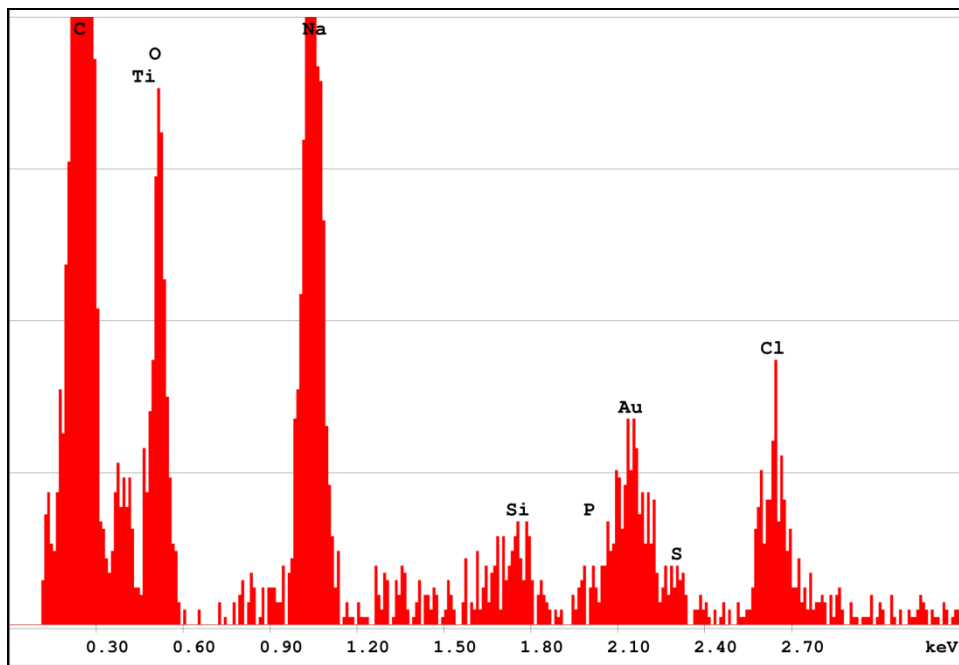

**Figure S5.** Energy dispersive X-ray spectroscopy confirmed that the contiguous structures observed with TEM contained Au after several washes in 20 mM HEPES buffer. Other peaks include Si/Ti/O from the substrate which the structures were deposited on, Na/Cl from salts in the buffer, and organic elements from the proteins.

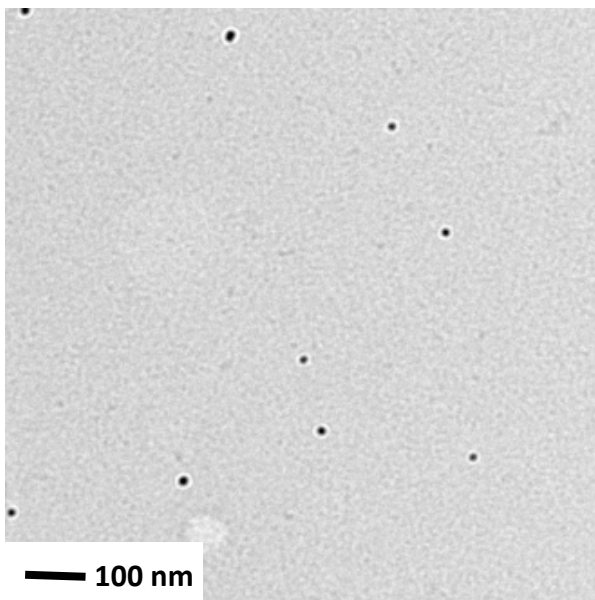

**Figure S6.** Non-stained TEM image showing growth of Au particles, but lack of contiguous, filament-based networks, using wild type recombinant PrGI filaments in Au reduction conditions.

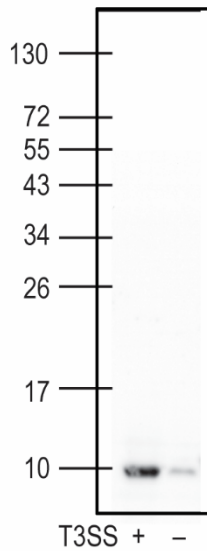

**Figure S7.** Anti-polyhistidine western blot showing presence of 6XHis-PrgI in samples containing needles sheared from the genomically modified 6XHis-PrgI strain, in T3SS inducing and non-inducing conditions.

**Table SI.** Plasmid constructs used in this study. Strains are wild type (wt) *S. enterica* and variants of the same unless otherwise indicated.

|       | <b>Strain</b>                  | <b>Plasmid</b>                          | <b>Description</b>                                     |
|-------|--------------------------------|-----------------------------------------|--------------------------------------------------------|
| pAA17 | wt                             | SptP-6XH-DH-FL                          | <i>SptP</i> -DH-FLAG tag/CmR/ColE1                     |
| pAA18 | $\Delta flhCD$                 | SptP-6XH-DH-FL                          | same                                                   |
| pAA19 | $\Delta prgI \Delta flhCD$     | SptP-6XH-DH-FL                          | same                                                   |
| pAA20 | <i>6XH-prgI</i> $\Delta flhCD$ | SptP-6XH-DH-FL                          | same                                                   |
| pAA21 | $\Delta flhCD$                 | pTet-6XHis-prgI                         | aTc-inducible 6XH-PrgI/KanR/p15a                       |
| pAA22 | $\Delta flhCD$                 | pTet-prgI                               | aTc-inducible PrgI/KanR/p15a                           |
| pAA23 | BL21 <i>E. coli</i>            | pET28b -6XHis-prgI <sup>Q26A/K50A</sup> | Recombinant 6XHis-prgI <sup>Q26A/K50A</sup> /KanR/p15a |
| pAA24 | BL21 <i>E. coli</i>            | pET28b-6XH-prgI                         | Recombinant 6XH-PrgI /KanR/ColE1                       |

**Table SII.** Primers used in this study.

**Primers used for creating  $\Delta$ *flhCD* strain using recombineering [2]**

---

Insertion of *cat-sacB* cassette in genome, first round of recombineering

---

Forward primer:

GTGCGGCTACGTCGCACAAAATAAAGTTGGTTATTCTGGTGTGACGGAAGATCACTTCG

Reverse primer:

TGACTTACCGCTGCTGGAGTGTTTGTCCACACCGTTTCGGATCAAAGGGAAAAGTGTCCATAT

---

Deletion of *cat-sacB* cassette in second round of recombineering to make scarless knock-in:

---

Forward primer:

GTGCGGCTACGTCGCACAAAATAAAGTTGGTTATTCTGGCCGAAACGGTGTGGACAAAC

Reverse primer:

TGACTTACCGCTGCTGGAGTGTTTGTCCACACCGTTTCGG

---

Sequencing primers used to confirm clean deletion:

---

Forward primer (upstream of *flhC*):

GAGGCTGCGTTATACGTCACAATG

Reverse primer (downstream of *flhD*):

CAACAGCGGAAGGATGATGTCGT

---

**Primers used for creating  $\Delta$ *prgI* strain and integration of *6XHis-prgI* in the *S. enterica* genome [2]**

---

Insertion of *cat-sacB* cassette in genome, first round of recombineering:

---

Forward primer:

AGGCCATTGGTATTTCCCAAGCCCACCTTAATTTAACGTAAATAAGGAAGTCATTATCAAAGGGAAA  
ACTGTCCATAT

Reverse primer:

TAACGGCATTCTCAGGGACAATAGTTGCAATCGACATAATCCACCTTATAACTGATGTGACGGAAG  
ATCACTTCG

---

Deletion of *cat-sacB* cassette in second round of recombineering to make clean deletion:

---

Forward primer:

AAAAGATGACTGGCTCAAGGGGCGCTCATTTACGTACGGGGCGGAAGGTTATATCAAATGAGCCC  
AGGCCATTGGTATTTCCCAAGCCCACCTTAATCAGTTATAAGGT

Reverse primer:

CAATGTCCGTTCCATAGACCTGATATTGACCGCCTGCCCTATAACGGCATTCTCAGGGACAATAGT  
TGCAATCGACATAATCCACCTTATAACTGATTAAGTGGGCTT

---

Sequencing primers used to confirm clean deletion:

---

Forward primer (homology to *prgH*):

CGGAAGGTTATATCAAATGAGCCC

Reverse primer (homology to *prgJ*):

TTCCATAGACCTGATATTGACCGC

---

Insertion of *6XHis-prgI* in *prgI* locus:

---

Forward primer:

CCCAAGCCCACCTTAATTTAACGTAAATAAGGAAGTCATTATGCACCACCACCACCACGCAACA  
CCTTGGTCAGG

Reverse primer:

GGACAATAGTTGCAATCGACATAATCCACCTTATAACTGATTAACGGAAGTTCTGAATAATGGC

---

**Primers for cloning PrgI from *S. enterica* genome**

---

Forward primer: AGTATCGAATTCATGAGATCTATGGCAACACCTTGGTCAG

Reverse primer: AGTATCCTCGAGTTAGGATCCTTAACGGAAGTTCTGAATAATGG

---

**Primer for appending 6XHis-tag N-terminally to PrgI**

---

Forward primer:

AGTATCGAATTCATGAGATCTATGGCACATCATCACCATCACCACACACCTTGGTCAG

Reverse primer: AGTATCCTCGAGTTAGGATCCTTAACGGAAGTTCTGAATAATGG

---

**Primers for making V65A and V67A solubility-enhancing mutations in PrgI via Quikchange**

---

Forward primer: GCAATCGAACACGGCAAAGCCTTTAAGGATATTGATG

Reverse primer: CATCAATATCCTTAAAGGCTTTTGCCGTGTTTCGATTGC

---

**Primer for cloning PrgI into pET28b(+) vector**

---

Forward primer: AGTATCCATATGGCAACACCTTGGTCAGGCTATCTG

Reverse primer: AGTATCGGTCTCACTTA ACGGAAGTTCTGAATAATGGC

---

**References**

1. Loquet A, Sgourakis NG, Gupta R, Giller K, Riedel D, Goosmann C, Griesinger C, Kolbe M, Baker D, Becker S, *et al.* 2012 Atomic model of the type III secretion system needle. *Nature* **486**, 276-279. (doi:10.1038/nature11079)
2. Thomason L, Court DL, Bubunencko M, Costantino N, Wilson H, Datta S, Oppenheim A. 2007 Recombineering: genetic engineering in bacteria using homologous recombination. *Curr. Protoc. Mol. Biol.* **78**, 1.16.1–1.16.24. (doi:10.1002/0471142727.mb0116s78)
